# Supplementary material for: Temporal predictability does not impact attentional blink performance: effects of fixed vs. random inter-trial intervals
Source: PeerJ. 2020 Mar 5;8:e8677. doi: 10.7717/peerj.8677 (PMC7060903; doi:10.7717/peerj.8677)
Supplement: Supplemental Information 6 — Each data point represents the proportion of correct responses for T2 given that T1 was identified correctly, from 30 trials. [file peerj-08-8677-s006.csv]

Date	Participant	Age	Gender	Trial Order	RandomFirst	Accuracy	Lag	ITI
17.04.15	P001	24	F	Rand, Fixed	1	0.5238	3	Random
29.04.15	P002	30	F	Fixed, Rand	0	0.6667	3	Random
29.04.15	P003	24	F	Fixed, Rand	0	0.2381	3	Random
08.05.15	P004	22	F	Rand, Fixed	1	0.7	3	Random
12.05.15	P005	57	F	Rand, Fixed	1	0.963	3	Random
14.05.15	P006	18	F	Fixed, Rand	0	0.9615	3	Random
15.05.15	P007	29	M	Rand, Fixed	1	0.6667	3	Random
15.05.15	P008	18	F	Fixed, Rand	0	0.84	3	Random
15.05.15	P009	19	F	Rand, Fixed	1	0.7143	3	Random
18.05.15	P010	18	F	Fixed, Rand	0	0.8667	3	Random
18.05.15	P011	18	M	Rand, Fixed	1	0.6154	3	Random
19.05.15	P012	18	F	Fixed, Rand	0	0.92	3	Random
19.05.15	P013	21	M	Rand, Fixed	1	0.72	3	Random
19.05.15	P014	19	F	Fixed, Rand	0	0.4074	3	Random
25.05.15	P015	19	F	Rand, Fixed	1	0.6552	3	Random
19.05.15	P016	18	F	Fixed, Rand	0	0.8519	3	Random
20.05.15	P017	19	M	Rand, Fixed	1	0.8148	3	Random
20.05.15	P018	18	M	Fixed, Rand	0	0.84	3	Random
21.05.15	P019	20	M	Rand, Fixed	1	0.5769	3	Random
22.05.15	P020	20	F	Fixed, Rand	0	0.8	3	Random
22.05.15	P021	19	M	Rand, Fixed	1	0.6429	3	Random
22.05.15	P022	22	F	Fixed, Rand	0	0.7083	3	Random
22.05.15	P023	19	F	Rand, Fixed	1	0.7241	3	Random
22.05.15	P024	18	M	Fixed, Rand	0	0.8077	3	Random
25.05.15	P025	18	F	Rand, Fixed	1	0.9286	3	Random
25.05.15	P026	18	F	Fixed, Rand	0	0.963	3	Random
25.05.15	P027	19	M	Rand, Fixed	1	0.8929	3	Random
25.05.15	P028	19	F	Fixed, Rand	0	0.6538	3	Random
25.05.15	P029	20	F	Rand, Fixed	1	0.931	3	Random
25.05.15	P030	23	F	Fixed, Rand	0	0.9655	3	Random
17.04.15	P001	24	F	Rand, Fixed	1	0.8571	8	Random
29.04.15	P002	30	F	Fixed, Rand	0	0.8571	8	Random
29.04.15	P003	24	F	Fixed, Rand	0	0.8462	8	Random
08.05.15	P004	22	F	Rand, Fixed	1	0.8929	8	Random
12.05.15	P005	57	F	Rand, Fixed	1	1	8	Random
14.05.15	P006	18	F	Fixed, Rand	0	1	8	Random
15.05.15	P007	29	M	Rand, Fixed	1	0.8462	8	Random
15.05.15	P008	18	F	Fixed, Rand	0	0.7931	8	Random
15.05.15	P009	19	F	Rand, Fixed	1	0.9474	8	Random
18.05.15	P010	18	F	Fixed, Rand	0	0.9643	8	Random
18.05.15	P011	18	M	Rand, Fixed	1	0.8	8	Random
19.05.15	P012	18	F	Fixed, Rand	0	1	8	Random
19.05.15	P013	21	M	Rand, Fixed	1	0.9259	8	Random
19.05.15	P014	19	F	Fixed, Rand	0	1	8	Random
25.05.15	P015	19	F	Rand, Fixed	1	0.9643	8	Random
19.05.15	P016	18	F	Fixed, Rand	0	1	8	Random
20.05.15	P017	19	M	Rand, Fixed	1	0.875	8	Random
20.05.15	P018	18	M	Fixed, Rand	0	0.963	8	Random
21.05.15	P019	20	M	Rand, Fixed	1	0.9615	8	Random
22.05.15	P020	20	F	Fixed, Rand	0	1	8	Random
22.05.15	P021	19	M	Rand, Fixed	1	0.5455	8	Random
22.05.15	P022	22	F	Fixed, Rand	0	0.9655	8	Random
22.05.15	P023	19	F	Rand, Fixed	1	0.9655	8	Random
22.05.15	P024	18	M	Fixed, Rand	0	0.8214	8	Random
25.05.15	P025	18	F	Rand, Fixed	1	0.9655	8	Random
25.05.15	P026	18	F	Fixed, Rand	0	0.9655	8	Random
25.05.15	P027	19	M	Rand, Fixed	1	1	8	Random
25.05.15	P028	19	F	Fixed, Rand	0	0.8929	8	Random
25.05.15	P029	20	F	Rand, Fixed	1	0.9667	8	Random
25.05.15	P030	23	F	Fixed, Rand	0	1	8	Random
17.04.15	P001	24	F	Rand, Fixed	1	0.6087	3	Fixed
29.04.15	P002	30	F	Fixed, Rand	0	0.375	3	Fixed
29.04.15	P003	24	F	Fixed, Rand	0	0.5	3	Fixed
08.05.15	P004	22	F	Rand, Fixed	1	0.6897	3	Fixed
12.05.15	P005	57	F	Rand, Fixed	1	0.8966	3	Fixed
14.05.15	P006	18	F	Fixed, Rand	0	0.75	3	Fixed
15.05.15	P007	29	M	Rand, Fixed	1	0.52	3	Fixed
15.05.15	P008	18	F	Fixed, Rand	0	0.76	3	Fixed
15.05.15	P009	19	F	Rand, Fixed	1	0.6897	3	Fixed
18.05.15	P010	18	F	Fixed, Rand	0	0.8519	3	Fixed
18.05.15	P011	18	M	Rand, Fixed	1	0.6818	3	Fixed
19.05.15	P012	18	F	Fixed, Rand	0	0.7083	3	Fixed
19.05.15	P013	21	M	Rand, Fixed	1	0.85	3	Fixed
19.05.15	P014	19	F	Fixed, Rand	0	0.4615	3	Fixed
25.05.15	P015	19	F	Rand, Fixed	1	0.6207	3	Fixed
19.05.15	P016	18	F	Fixed, Rand	0	0.7917	3	Fixed
20.05.15	P017	19	M	Rand, Fixed	1	0.8333	3	Fixed
20.05.15	P018	18	M	Fixed, Rand	0	0.4375	3	Fixed
21.05.15	P019	20	M	Rand, Fixed	1	0.8276	3	Fixed
22.05.15	P020	20	F	Fixed, Rand	0	0.6522	3	Fixed
22.05.15	P021	19	M	Rand, Fixed	1	0.9333	3	Fixed
22.05.15	P022	22	F	Fixed, Rand	0	0.625	3	Fixed
22.05.15	P023	19	F	Rand, Fixed	1	0.8148	3	Fixed
22.05.15	P024	18	M	Fixed, Rand	0	0.8	3	Fixed
25.05.15	P025	18	F	Rand, Fixed	1	0.9655	3	Fixed
25.05.15	P026	18	F	Fixed, Rand	0	0.8966	3	Fixed
25.05.15	P027	19	M	Rand, Fixed	1	0.8929	3	Fixed
25.05.15	P028	19	F	Fixed, Rand	0	0.5	3	Fixed
25.05.15	P029	20	F	Rand, Fixed	1	0.963	3	Fixed
25.05.15	P030	23	F	Fixed, Rand	0	0.8333	3	Fixed
17.04.15	P001	24	F	Rand, Fixed	1	0.8148	8	Fixed
29.04.15	P002	30	F	Fixed, Rand	0	0.7857	8	Fixed
29.04.15	P003	24	F	Fixed, Rand	0	0.6667	8	Fixed
08.05.15	P004	22	F	Rand, Fixed	1	0.931	8	Fixed
12.05.15	P005	57	F	Rand, Fixed	1	0.9655	8	Fixed
14.05.15	P006	18	F	Fixed, Rand	0	0.8966	8	Fixed
15.05.15	P007	29	M	Rand, Fixed	1	0.8148	8	Fixed
15.05.15	P008	18	F	Fixed, Rand	0	0.8846	8	Fixed
15.05.15	P009	19	F	Rand, Fixed	1	0.9333	8	Fixed
18.05.15	P010	18	F	Fixed, Rand	0	0.931	8	Fixed
18.05.15	P011	18	M	Rand, Fixed	1	0.7143	8	Fixed
19.05.15	P012	18	F	Fixed, Rand	0	0.9643	8	Fixed
19.05.15	P013	21	M	Rand, Fixed	1	0.931	8	Fixed
19.05.15	P014	19	F	Fixed, Rand	0	0.8929	8	Fixed
25.05.15	P015	19	F	Rand, Fixed	1	0.9643	8	Fixed
19.05.15	P016	18	F	Fixed, Rand	0	0.8929	8	Fixed
20.05.15	P017	19	M	Rand, Fixed	1	0.8571	8	Fixed
20.05.15	P018	18	M	Fixed, Rand	0	0.95	8	Fixed
21.05.15	P019	20	M	Rand, Fixed	1	0.9643	8	Fixed
22.05.15	P020	20	F	Fixed, Rand	0	0.8929	8	Fixed
22.05.15	P021	19	M	Rand, Fixed	1	0.9667	8	Fixed
22.05.15	P022	22	F	Fixed, Rand	0	0.963	8	Fixed
22.05.15	P023	19	F	Rand, Fixed	1	0.8966	8	Fixed
22.05.15	P024	18	M	Fixed, Rand	0	0.85	8	Fixed
25.05.15	P025	18	F	Rand, Fixed	1	0.9667	8	Fixed
25.05.15	P026	18	F	Fixed, Rand	0	1	8	Fixed
25.05.15	P027	19	M	Rand, Fixed	1	0.931	8	Fixed
25.05.15	P028	19	F	Fixed, Rand	0	0.9615	8	Fixed
25.05.15	P029	20	F	Rand, Fixed	1	1	8	Fixed
25.05.15	P030	23	F	Fixed, Rand	0	1	8	Fixed
